# Supplementary material for: Type-III organic/two-dimensional multi-layered phototransistors with promoted operation speed at the communication band
Source: Royal Society of Chemistry journal article supplement (doi:10.1039/d1tc03657b), 2021-01-01
Supplement: d1tc03657b1.pdf [file d1tc03657b1.pdf]

## **Supporting Materials**

### **Type-III Organic/Two-Dimensional multi-layer Phototransistors with Promoted Operation Speed at Communication Band**

*Jiayue Han, Chaoyi Zhang, Silu Peng, Xingchao Zhang, Xianchao Liu, Hongxi Zhou,  
Zhiming Wu, He Yu and Jun Wang\**

Dr. J. Han, Dr. C. Zhang, Dr. S. Peng, Dr. X. Zhang, Dr. X. Liu, Dr. H. Zhou, Prof. Z.  
Wu, Prof. H. Yu, Prof. J. Wang  
School of Optoelectronic Science and Engineering, University of Electronic Science  
and Technology of China, Chengdu 610054, China

E-mail: [wjun@uestc.edu.cn](mailto:wjun@uestc.edu.cn)

1. The EDS of graphene/HAT-CN/Bi<sub>2</sub>O<sub>2</sub>Se on SiO<sub>2</sub> substrate.

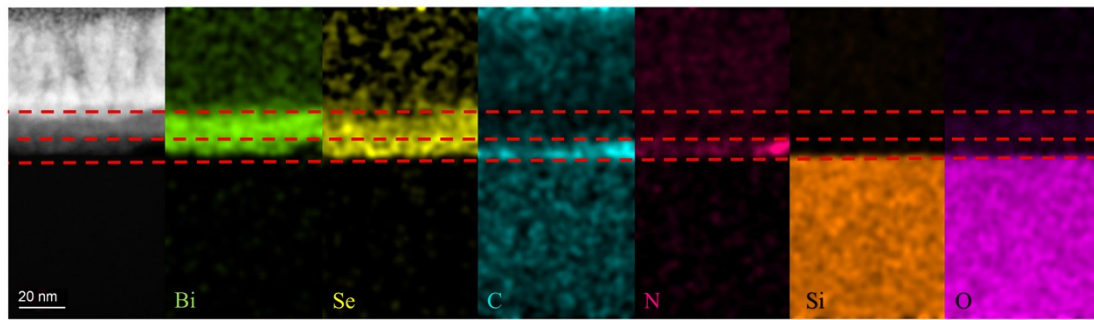

**Fig. S1.** The EDS of our device can distinguish Bi<sub>2</sub>O<sub>2</sub>Se and graphene/HAT-CN.

## 2. The Raman spectrum of HAT-CN on SiO<sub>2</sub> substrate.

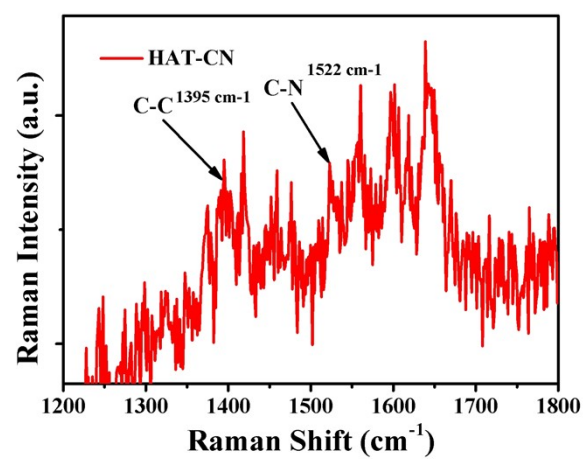

**Fig. S2.** The Raman spectrum of HAT-CN can distinguish C-C peak and C-N peak.

### 3. The $V_g$ modulation on graphene/HAT-CN/ $\text{Bi}_2\text{O}_2\text{Se}$ phototransistor.

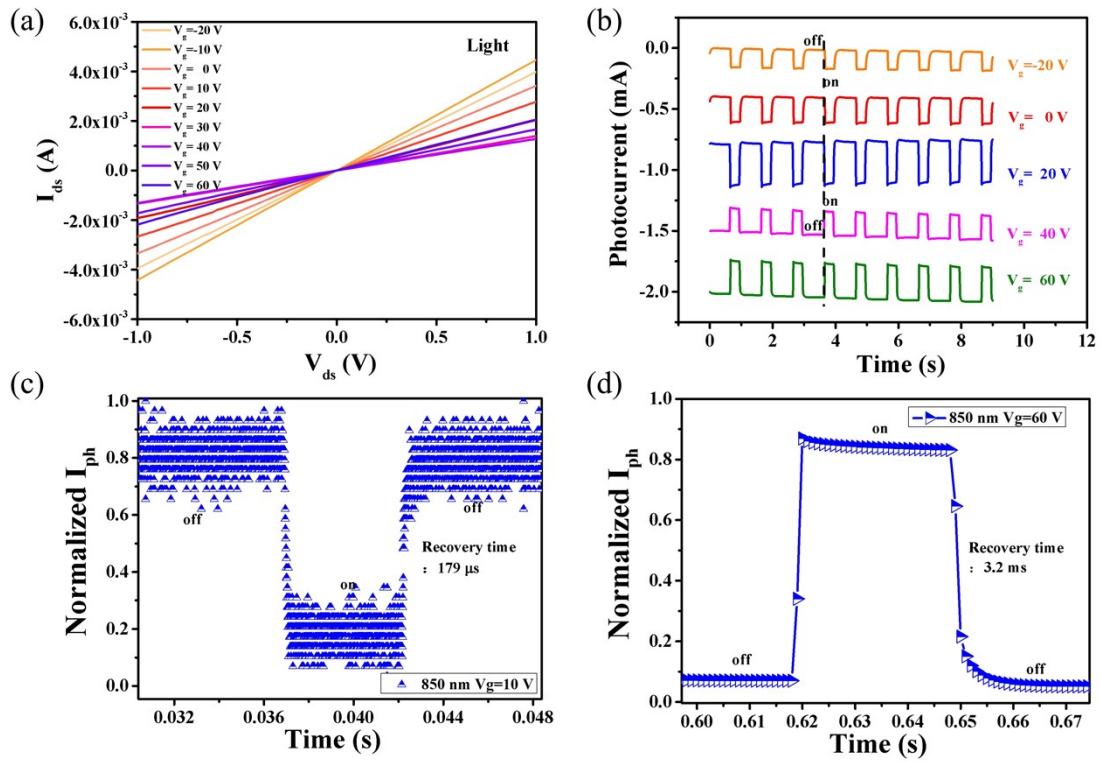

**Fig. S3.** The IV and photocurrent measurements at different gate voltages under the 850 nm with 60  $\text{mW}/\text{cm}^2$

#### 4. The graphene/Bi<sub>2</sub>O<sub>2</sub>Se control phototransistor.

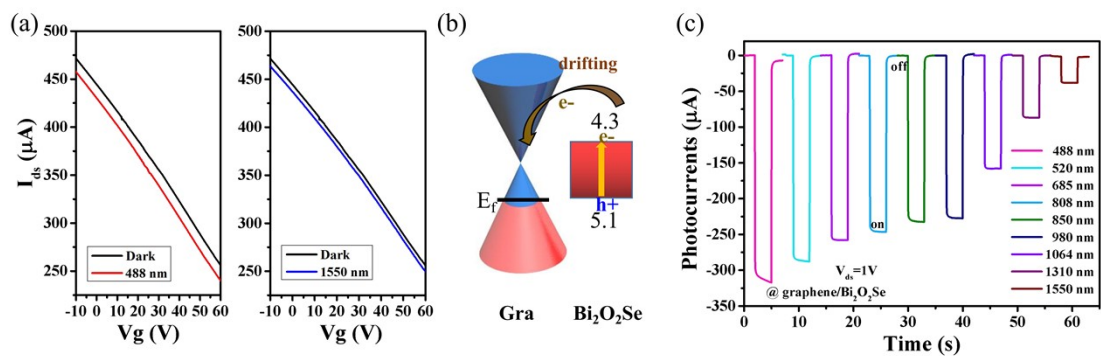

**Fig. S4.** Optoelectronic characterization and measurements of graphene/Bi<sub>2</sub>O<sub>2</sub>Se phototransistor. (a) The  $V_{ds}$  curve with varied  $V_g$  applying. (b) The energy band schematic of graphene/Bi<sub>2</sub>O<sub>2</sub>Se. (c) Transient response performance of graphene/Bi<sub>2</sub>O<sub>2</sub>Se.

## 5. Photocurrent measurements at increasing input power density.

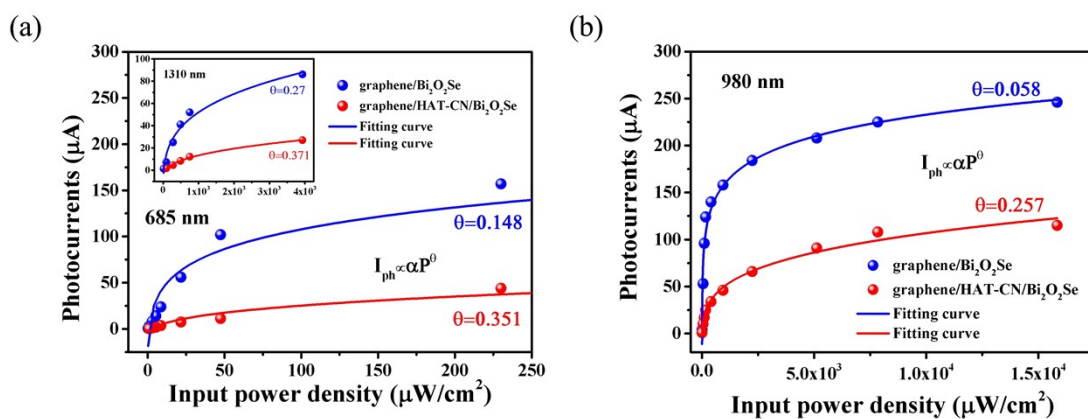

**Fig. S5.** Transient photocurrent measurements at increasing input power density of graphene/Bi<sub>2</sub>O<sub>2</sub>Se and graphene/HAT-CN/Bi<sub>2</sub>O<sub>2</sub>Se control devices.

## 6. The response time of graphene/HAT-CN/Bi<sub>2</sub>O<sub>2</sub>Se at communication band.

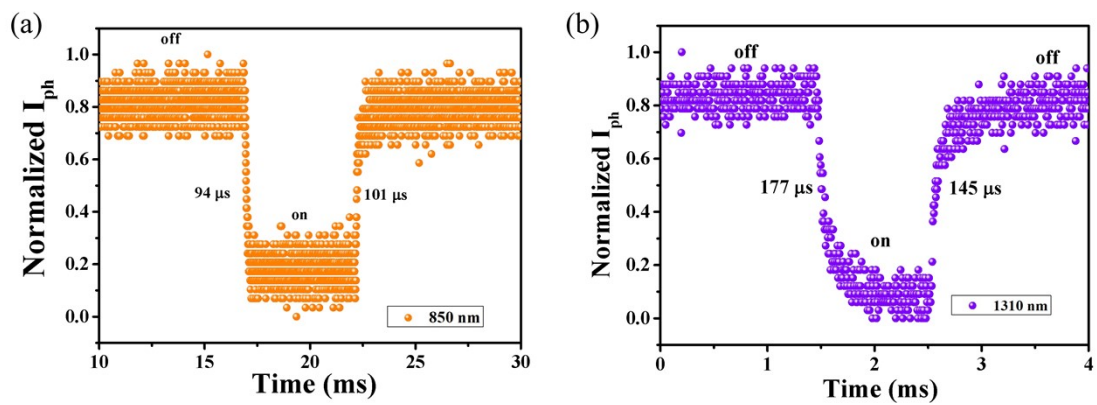

**Fig. S6.** (a,b) The dynamic response time of graphene/HAT-CN/Bi<sub>2</sub>O<sub>2</sub>Se with the irradiated light at 850 and 1310 nm.

## 7. The thickness dependent performance of graphene/HAT-CN/Bi<sub>2</sub>O<sub>2</sub>Se.

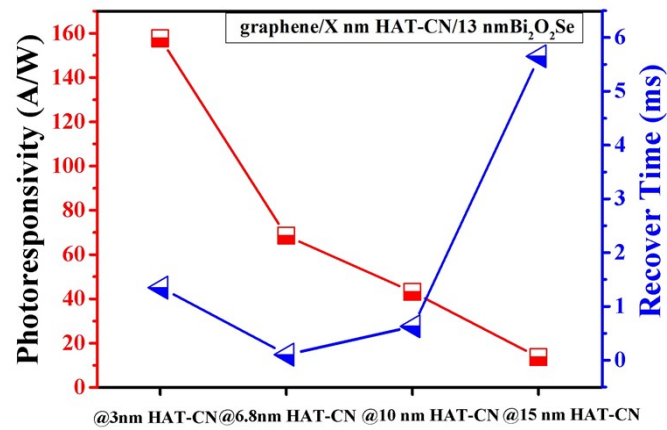

**Fig. S7.** The responsivity and recover time of thickness various HATCN devices at 1310 nm.



## 8. The noise spectrum of graphene/Bi<sub>2</sub>O<sub>2</sub>Se

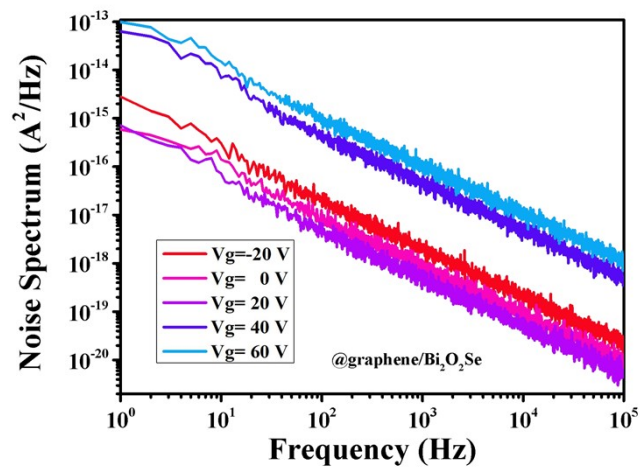

**Fig. S8.** The 1/f noise analysis of the device for different V<sub>g</sub> values.

## 9. The stability of graphene/HAT-CN/Bi<sub>2</sub>O<sub>2</sub>Se

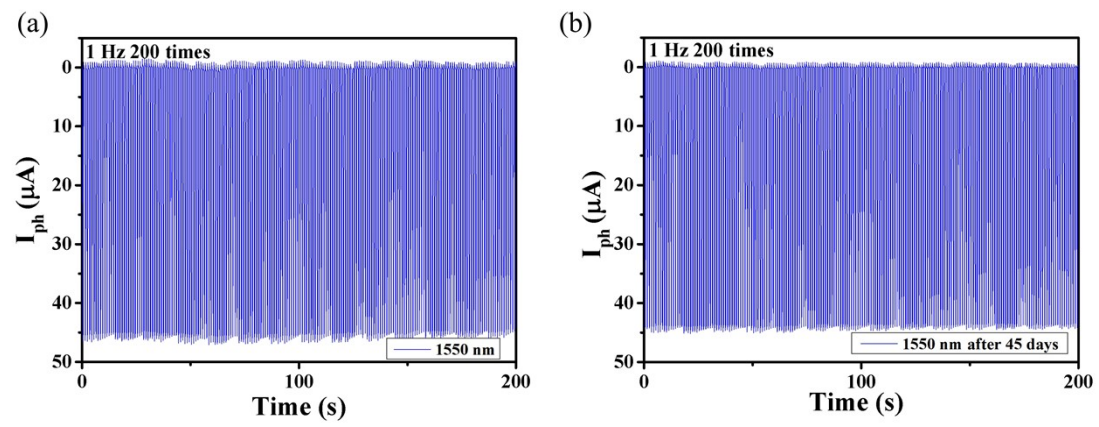

**Fig. S9.** (a) The detection stability of graphene/HAT-CN/Bi<sub>2</sub>O<sub>2</sub>Se at 1550 nm. (b) And after 45 days, the stability of graphene/HAT-CN/Bi<sub>2</sub>O<sub>2</sub>Se.
